# Supplementary material for: Critical Appraisal and Data Extraction for Systematic Reviews of Prediction Modelling Studies: The CHARMS Checklist
Source: PLoS Med. 2014 Oct 14;11(10):e1001744. doi: 10.1371/journal.pmed.1001744 (PMC4196729; doi:10.1371/journal.pmed.1001744)
Supplement: Text S1 — A one-page checklist of relevant items to extract from individual studies in a systematic review of prediction models. (DOCX) [file pmed.1001744.s001.docx]

CHARMS 2014 Relevant items to extract from individual studies in a systematic review of prediction models

| **Domain** | **Key items** | **Reported**  **on page #** |
| --- | --- | --- |
| **SOURCE OF DATA** | Source of data (e.g., cohort, case-control, randomized trial participants, or registry data) |  |
| **PARTICIPANTS** | Participant eligibility and recruitment method (e.g., consecutive participants, location, number of centers, setting, inclusion and exclusion criteria) |  |
| Participant description |  |
| Details of treatments received, if relevant |  |
| Study dates |  |
| **OUTCOME(S) TO BE PREDICTED** | Definition and method for measurement of outcome |  |
| Was the same outcome definition (and method for measurement) used in all patients? |  |
| Type of outcome (e.g., single or combined endpoints) |  |
| Was the outcome assessed without knowledge of the candidate predictors (i.e., blinded)? |  |
| Were candidate predictors part of the outcome (e.g., in panel or consensus diagnosis)? |  |
| Time of outcome occurrence or summary of duration of follow-up |  |
| **CANDIDATE PREDICTORS**  **(OR INDEX TESTS)** | Number and type of predictors (e.g., demographics, patient history, physical examination, additional testing, disease characteristics) |  |
| Definition and method for measurement of candidate predictors |  |
| Timing of predictor measurement (e.g., at patient presentation, at diagnosis, at treatment initiation) |  |
| Were predictors assessed blinded for outcome, and for each other (if relevant)? |  |
| Handling of predictors in the modelling (e.g., continuous, linear, non-linear transformations or categorised) |  |
| **SAMPLE SIZE** | Number of participants and number of outcomes/events |  |
| Number of outcomes/events in relation to the number of candidate predictors (Events Per Variable) |  |
| **MISSING DATA** | Number of participants with any missing value (include predictors and outcomes) |  |
| Number of participants with missing data for each predictor |  |
| Handling of missing data (e.g., complete-case analysis, imputation, or other methods) |  |
| **MODEL DEVELOPMENT** | Modelling method (e.g., logistic, survival, neural network, or machine learning techniques) |  |
| Modelling assumptions satisfied |  |
| Method for selection of predictors **for inclusion** in multivariable modelling (e.g., all candidate predictors, pre-selection based on unadjusted association with the outcome) |  |
| Method for selection of predictors **during multivariable modelling** (e.g., full model approach, backward or forward selection) and criteria used (e.g., p-value, Akaike Information Criterion) |  |
| Shrinkage of predictor weights or regression coefficients (e.g., no shrinkage, uniform shrinkage, penalized estimation) |  |
| **MODEL PERFORMANCE** | Calibration (calibration plot, calibration slope, Hosmer-Lemeshow test) and Discrimination  (C-statistic, D-statistic, log-rank) measures with confidence intervals |  |
| Classification measures (e.g., sensitivity, specificity, predictive values, net reclassification improvement) and whether a-priori cut points were used |  |
| **MODEL**  **EVALUATION** | Method used for testing model performance: development dataset only (random split of data, resampling methods e.g. bootstrap or cross-validation, none) or separate external validation (e.g. temporal, geographical, different setting, different investigators) |  |
| In case of poor validation, whether model was adjusted or updated (e.g., intercept recalibrated, predictor effects adjusted, or new predictors added) |  |
| **RESULTS** | Final and other multivariable models (e.g., basic, extended, simplified) presented, including predictor weights or regression coefficients, intercept, baseline survival, model performance measures (with standard errors or confidence intervals) |  |
| Any alternative presentation of the final prediction models, e.g., sum score, nomogram, score chart, predictions for specific risk subgroups with performance |  |
| Comparison of the distribution of predictors (including missing data) for development and validation datasets |  |
| **INTERPRETATION AND DISCUSSION** | Interpretation of presented models (confirmatory, i.e., model useful for practice versus exploratory, i.e., more research needed) |  |
| Comparison with other studies, discussion of generalizability, strengths and limitations. |  |
